# Supplementary material for: Facile synthesis of a heterostructured lanthanum-doped SnO2 anchored with rGO for asymmetric supercapacitors and photocatalytic dye degradation
Source: Royal Society of Chemistry journal article supplement (doi:10.1039/d1nj04584a), 2021-01-01
Supplement: d1nj04584a2.pdf [file d1nj04584a2.pdf]

### Supplementary information

## Facile synthesis of hetrostructured lanthanum doped SnO<sub>2</sub> anchored with rGO for asymmetric supercapacitor and photocatalytic dye degradation

S. Asaithambi<sup>1,2</sup>, P. Sakthivel<sup>1</sup>, M. Karuppaiah<sup>1</sup>, V. Balaji<sup>1</sup>, R.Yuvakkumar<sup>1</sup>,  
DhayanVelauthapillai<sup>2</sup>, G. Ravi<sup>1\*</sup>

<sup>1</sup>Department of Physics, Alagappa University, Karaikudi-630003, Tamil Nadu, India.

<sup>2</sup>Department of Engineering and Science, Western Norway University of Applied Sciences, Bergen, 5063, Norway.

\*Corresponding author: [gravicrc@gmail.com](mailto:gravicrc@gmail.com). Telephone: +914565-225206

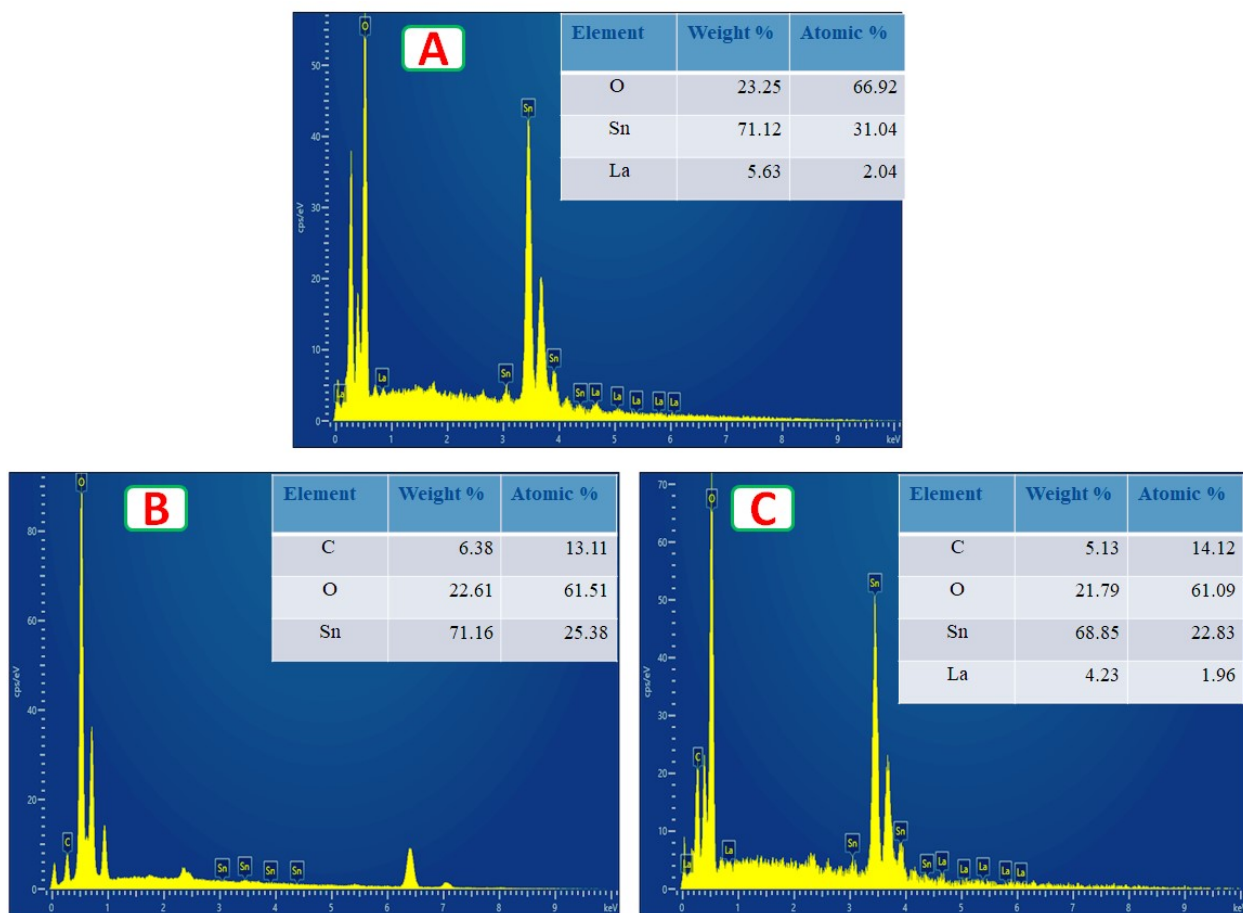

Figure S1 EDSspectra of (A) La-SnO<sub>2</sub>, (B) SnO<sub>2</sub>@rGO and (C) La-SnO<sub>2</sub>@rGO samples.

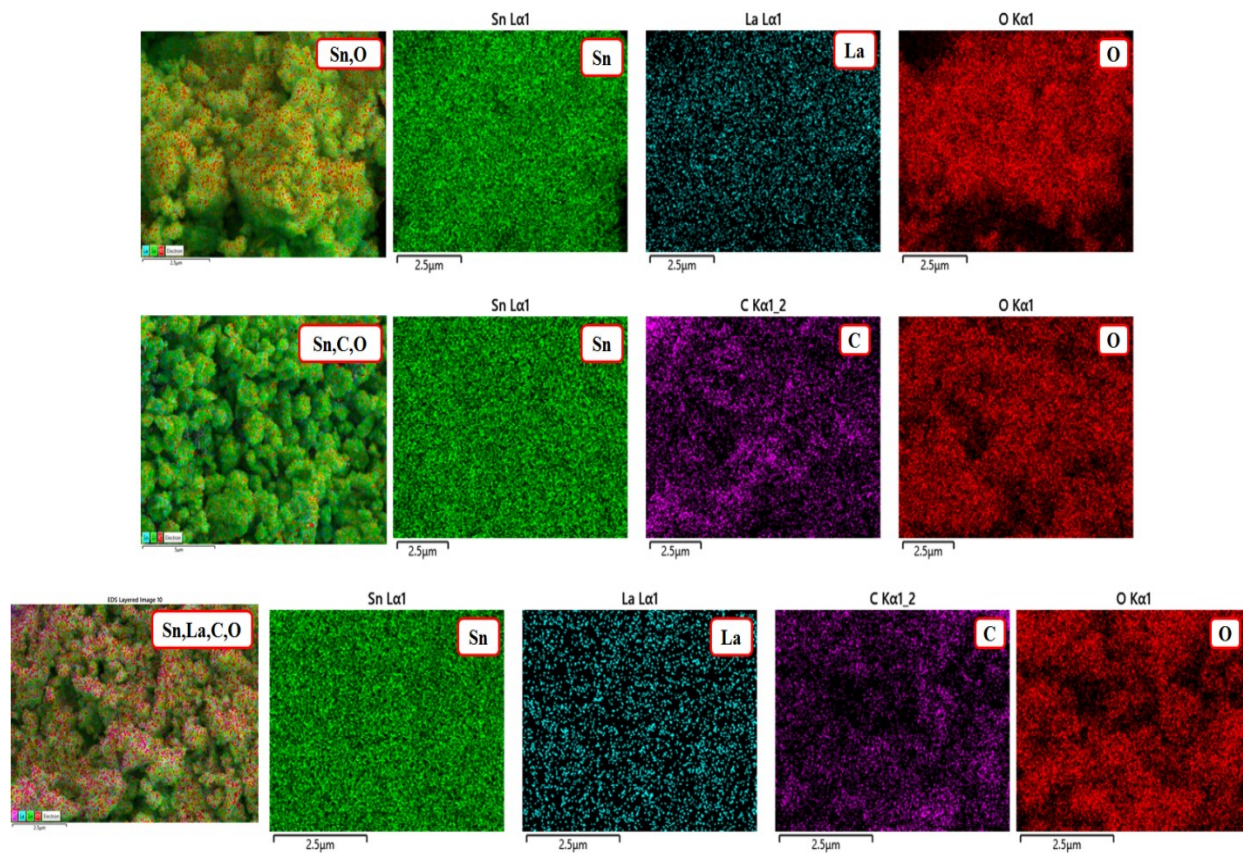

**Figure S2.**Element mapping analysis of the La-SnO<sub>2</sub> (1<sup>st</sup> row), SnO<sub>2</sub>@rGO (2<sup>nd</sup> row) and La-SnO<sub>2</sub>@rGO (3<sup>rd</sup> row) samples.

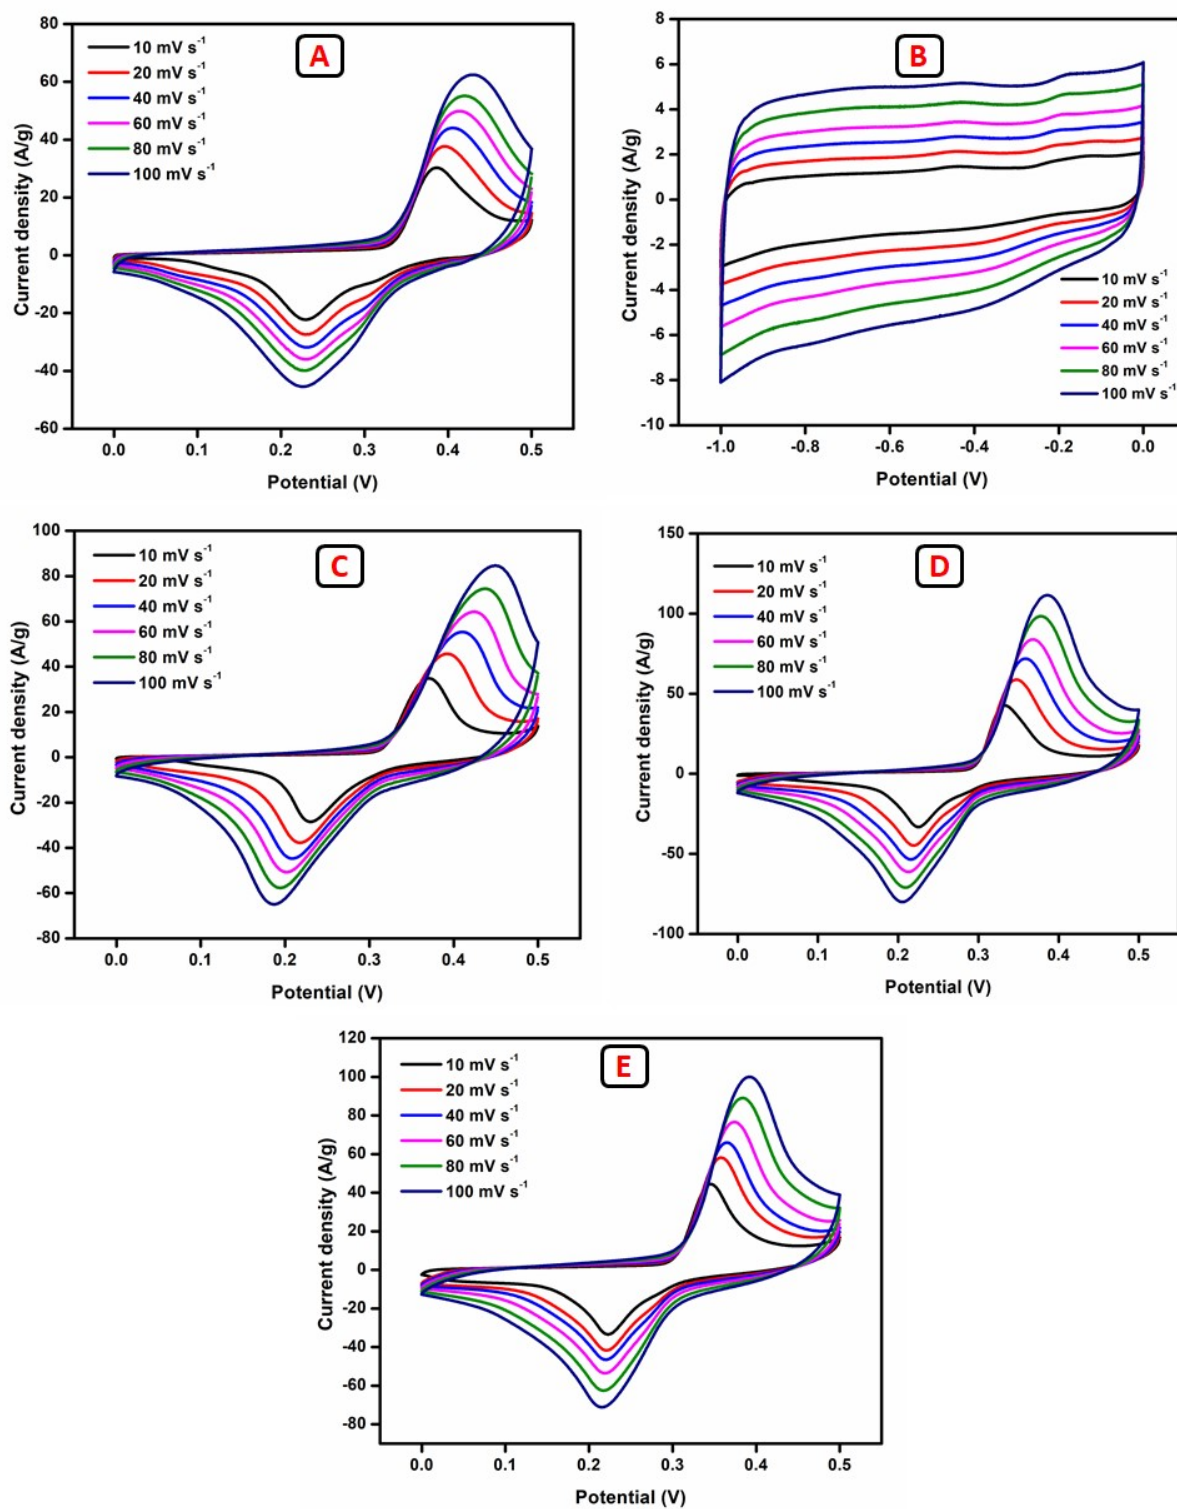

**Figure S3** CV curve of (A) SnO<sub>2</sub>, (B) rGO, (C) La-SnO<sub>2</sub>, (D) SnO<sub>2</sub>@rGO and (E) La-SnO<sub>2</sub>@rGO electrodes with different scan rates (10-100 mV s<sup>-1</sup>).

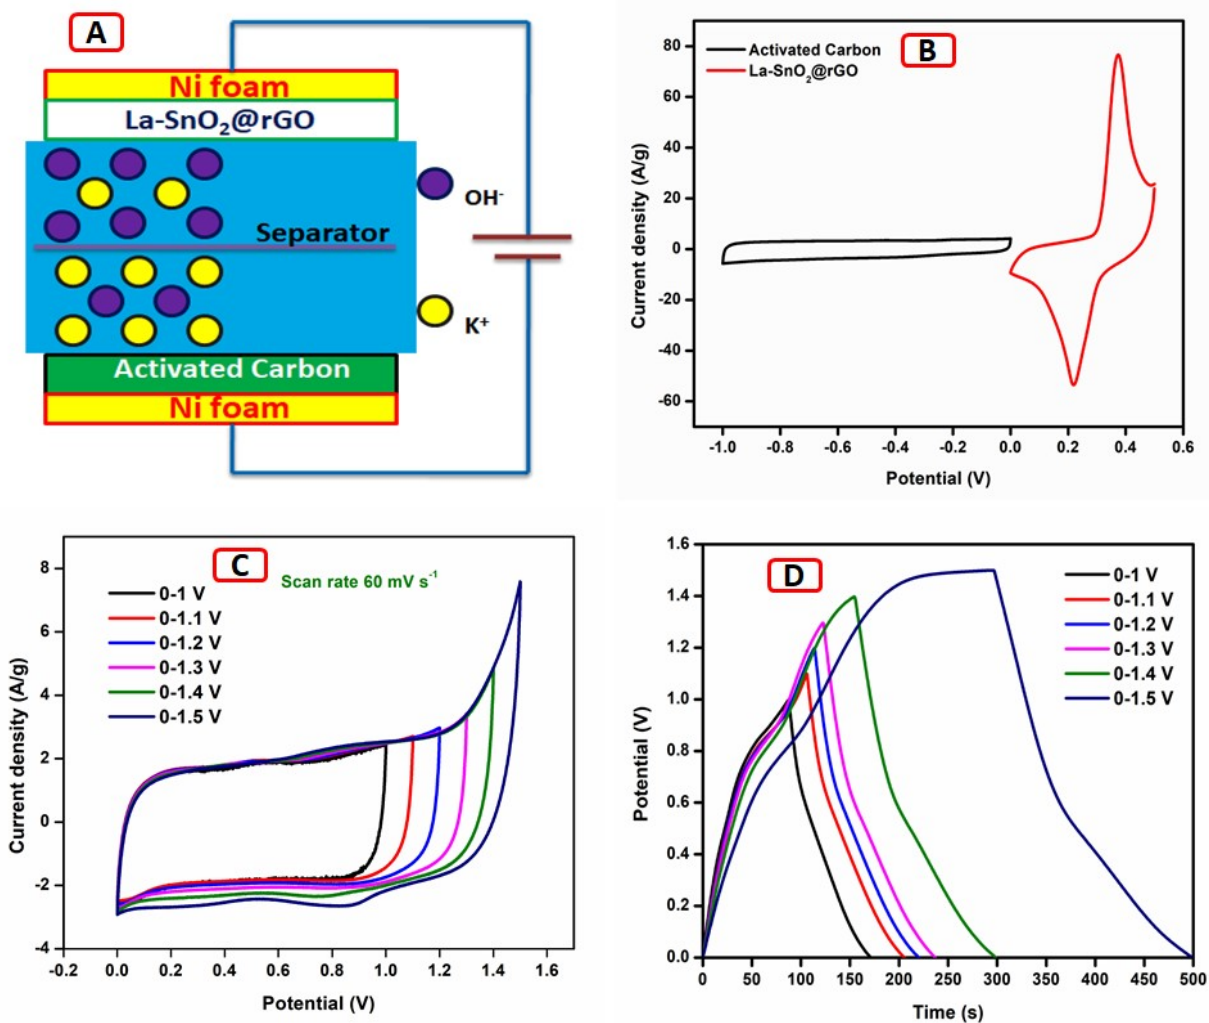

Figure S4 (A) Schematic diagram of La-SnO<sub>2</sub>@rGO//AC device, B) CV curves of AC and La-SnO<sub>2</sub>@rGO electrodes using a three electrode setup, C) CV curves of the device with varying potential range (0-1.5V) at a scan rates of 60 mV/s, D) GCD curves of the device varying potential ranges at current density of 1 A/g.
