# Supplementary figures and images for: Facile synthesis of a heterostructured lanthanum-doped SnO2 anchored with rGO for asymmetric supercapacitors and photocatalytic dye degradation
Source: Royal Society of Chemistry journal article supplement (doi:10.1039/d1nj04584a), 2021-01-01

Figure S1

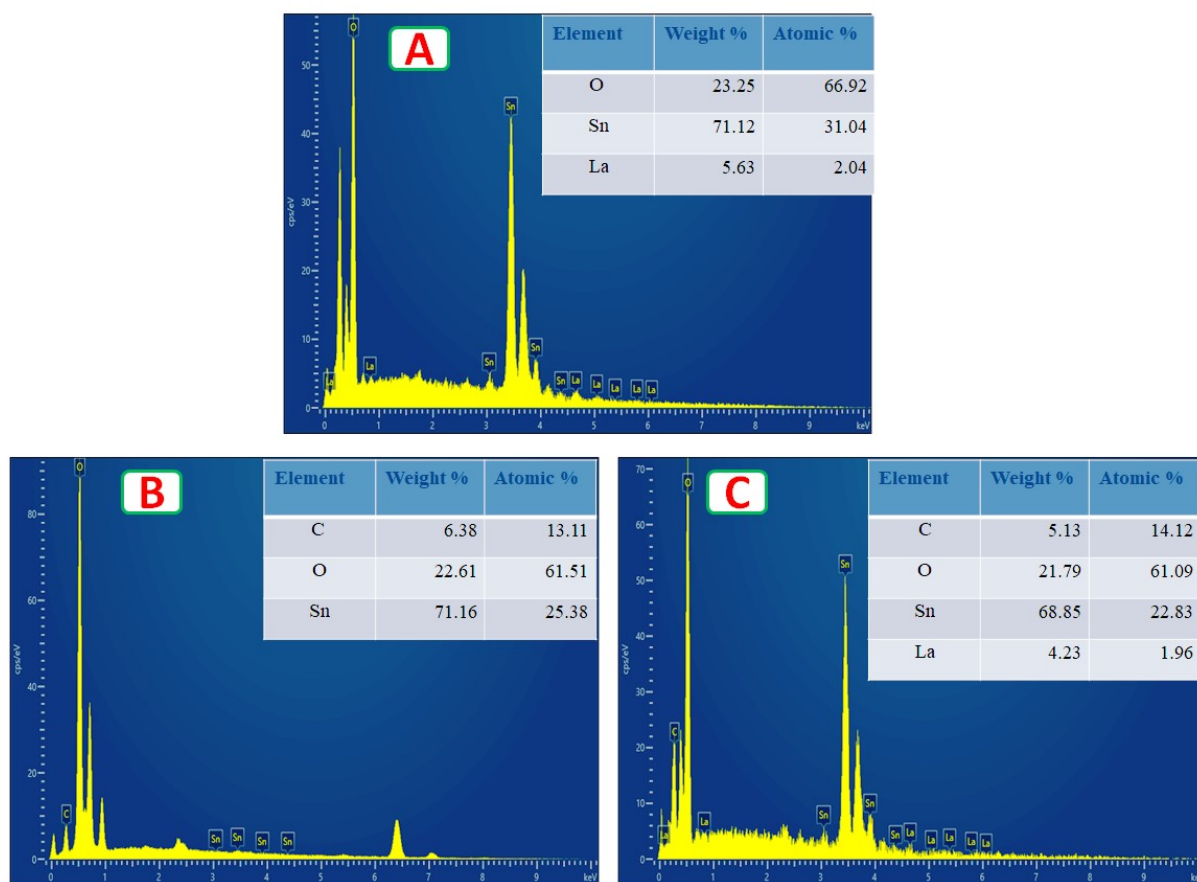

Figure S2

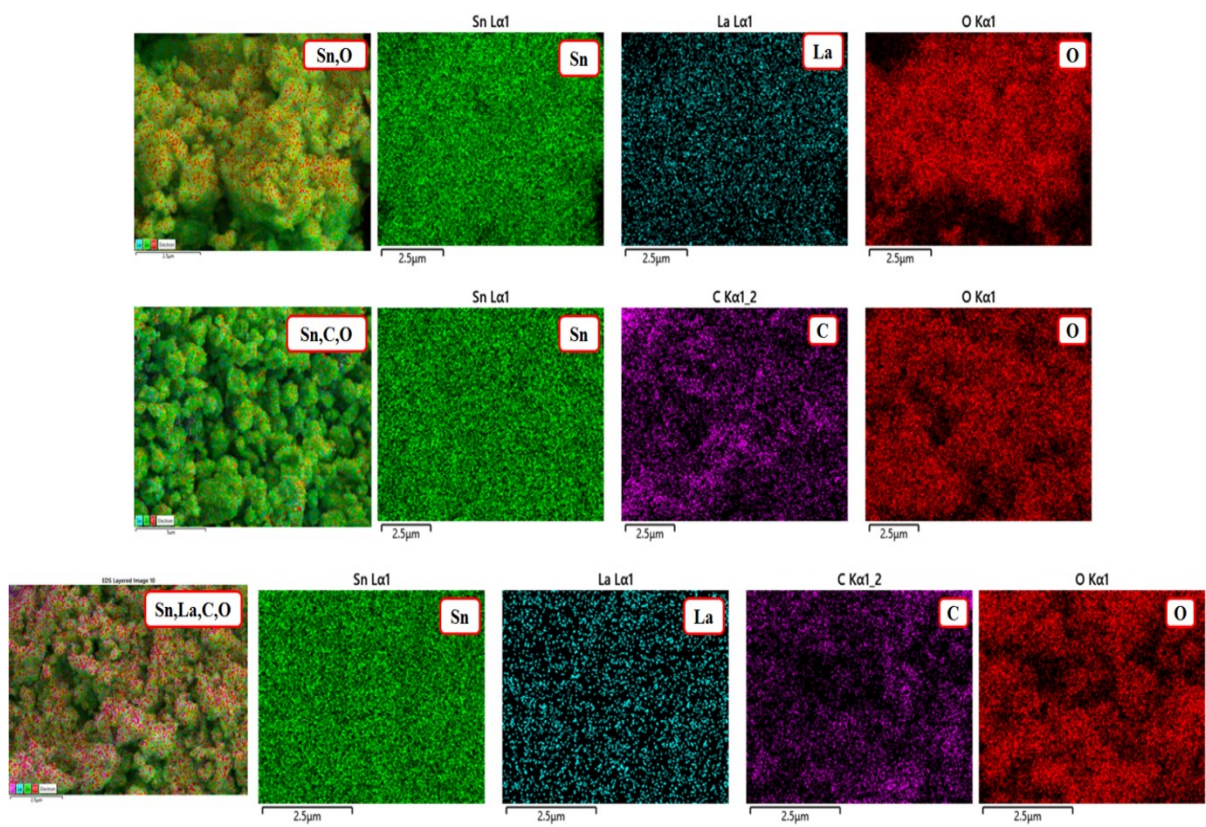

**Figure S3**

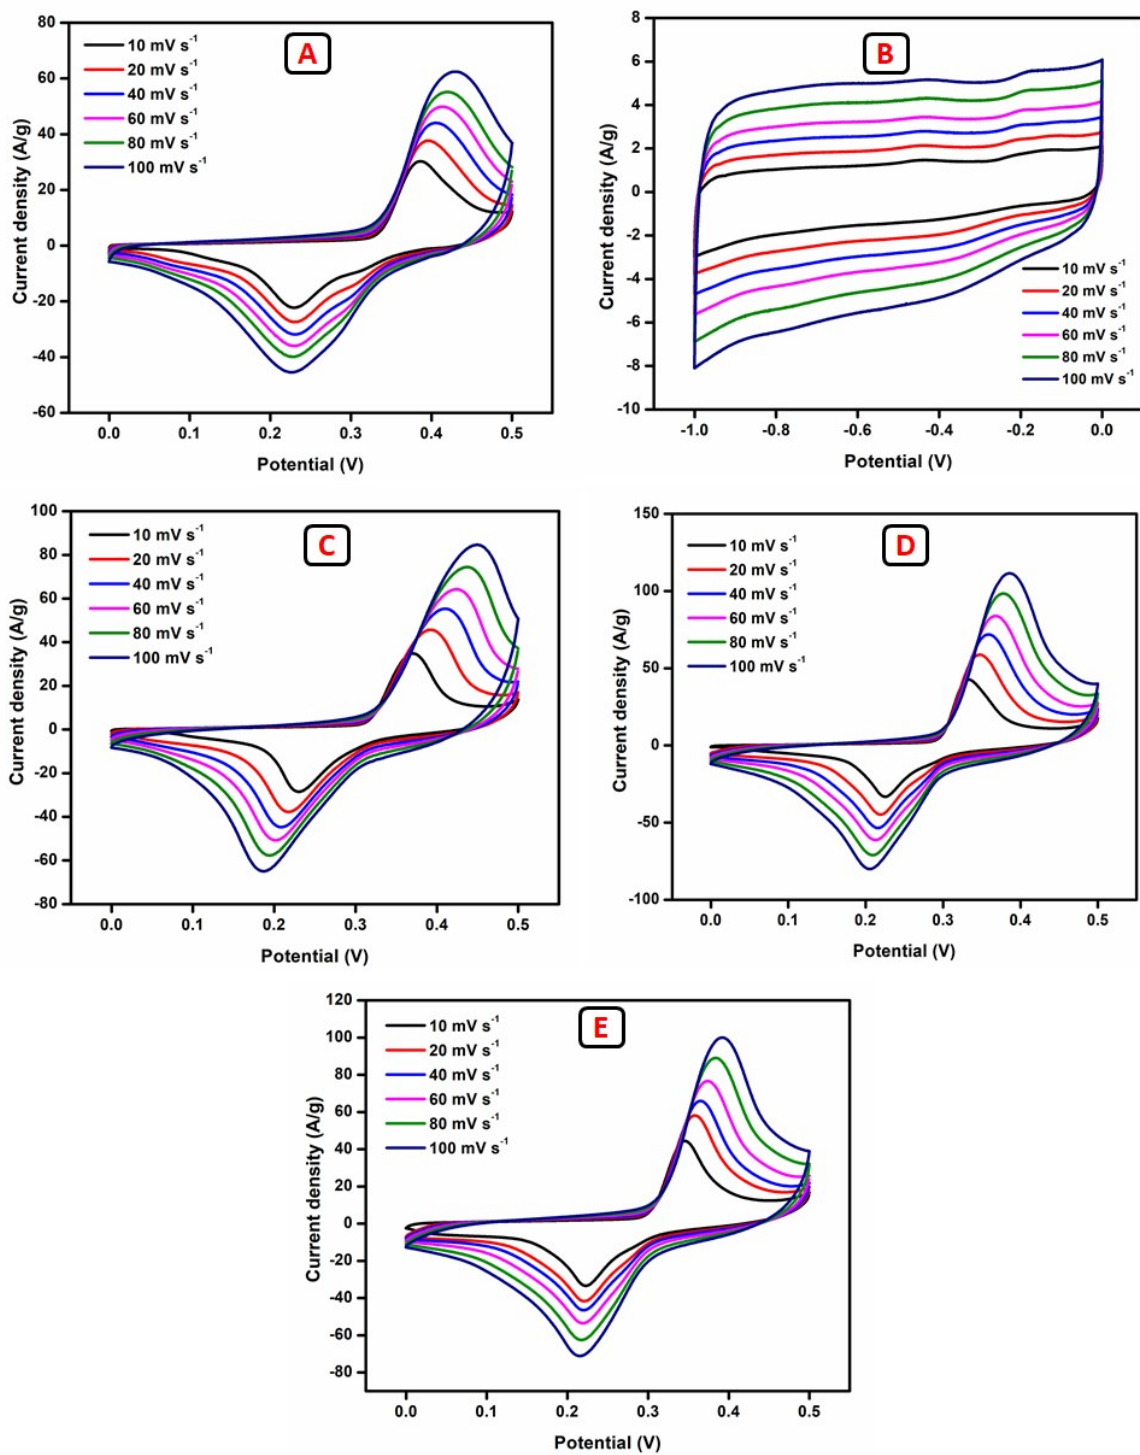

Figure S4

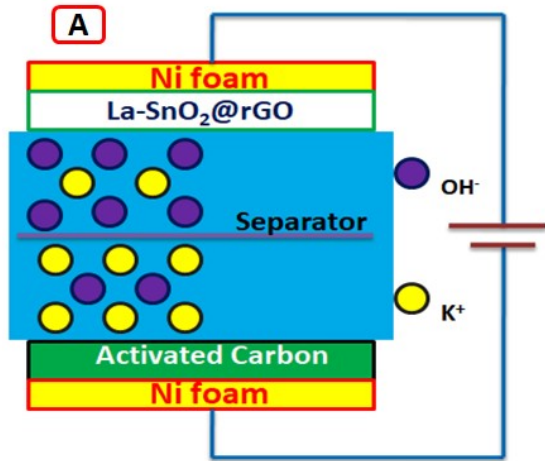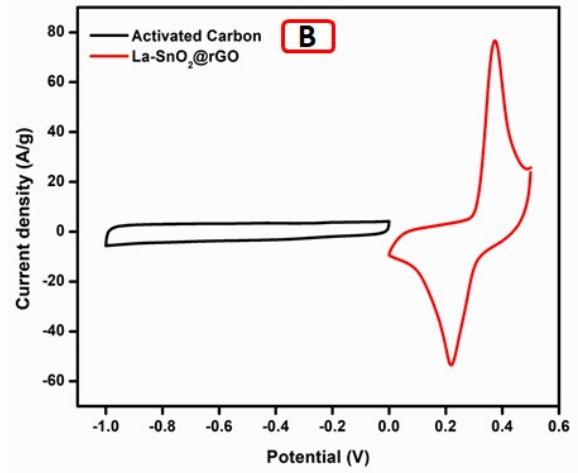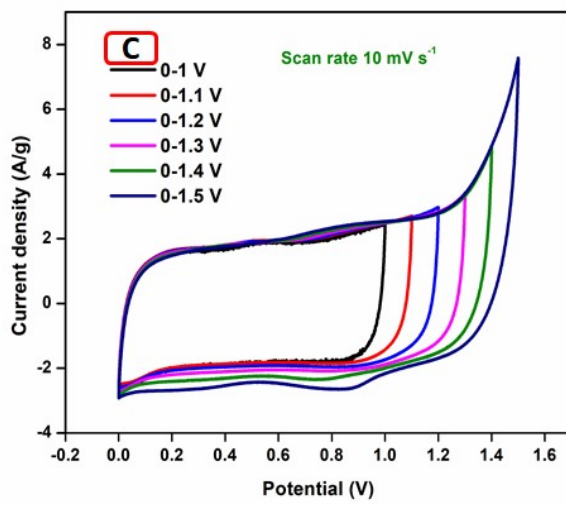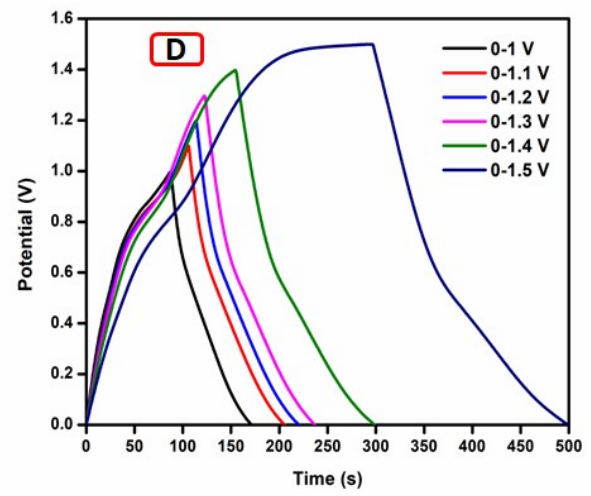

Supplement: d1nj04584a1.pdf [file d1nj04584a1.pdf]
